**1 Infection avoidance behaviour: female fruit flies adjust foraging effort in**  
**2 response to internal and external cues of viral infection**

3

4 Pedro F. Vale<sup>1,2,\*</sup>, Michael D. Jardine<sup>1</sup>

5

6 <sup>1</sup> Institute of Evolutionary Biology, School of Biological Sciences, University of  
 7 Edinburgh. Edinburgh EH9-3FL

8

9 <sup>2</sup> Centre for Immunity, Infection and Evolution, University of Edinburgh.  
 10 Edinburgh EH9 3FL

11

12

13 \* Email for correspondence : [pedro.vale@ed.ac.uk](mailto:pedro.vale@ed.ac.uk)

14

15 Infection avoidance behaviours are the first line of defence against pathogenic  
 16 encounters. Behavioural plasticity in response to internal or external cues can  
 17 therefore generate potentially significant heterogeneity in infection. We tested  
 18 whether *Drosophila melanogaster* exhibits infection avoidance behaviour  
 19 during foraging, and whether this behaviour is modified by prior exposure to  
 20 Drosophila C Virus (DCV) and by the risk of DCV encounter. We examined two  
 21 measures of infection avoidance: (1) the motivation to feed in the presence of  
 22 an infection risk and (2) the preference to feed on a clean food source over a  
 23 potentially infectious source. While we found no clear evidence for preference  
 24 of clean food sources over potentially infectious ones, female flies were less  
 25 motivated to feed when presented with a risk of encountering DCV, but only if  
 26 they had been previously exposed to the virus. We discuss the relevance of  
 27 behavioural plasticity during foraging for host fitness and pathogen spread.

## 28     **Introduction**

29             Hosts vary considerably in their ability to acquire and transmit  
30     infection <sup>1-3</sup>, and much of this variation is caused by differences in the contact  
31     rate between susceptible individuals and sources of infection<sup>4,5</sup>. For example,  
32     viruses of *Drosophila* fruit flies are not only widely distributed, they also show  
33     very broad host range<sup>6</sup>. Given the high viral prevalence of pathogens in  
34     natural environments, mounting a timely and efficient immune response to all  
35     possible pathogenic challenges would be physiologically costly and ultimately  
36     ineffective. Hosts capable of reducing the probability of contacting parasites,  
37     infected conspecifics or infectious environments can therefore not only  
38     prevent the deleterious effects of infection, but also circumvent the  
39     undesirable energetic costs of immune responses, including  
40     immunopathology <sup>4,7</sup>. Avoiding infection is therefore the first line of non-  
41     immunological defence against infection<sup>8</sup>, and is known to occur across a  
42     broad range of host taxa, including humans <sup>7,9</sup>.

43  
44             Like most traits, infection avoidance behaviours are likely to vary  
45     according to the context of infection, and pathogens are major drivers this  
46     context <sup>4,7,9-11</sup>. Pathogens may alter host responses in two ways. By altering  
47     the immunophysiology of the host during infection, pathogens can alter host  
48     behaviour <sup>12,13</sup>. Pathogens also modify the host external environment by  
49     increasing the likelihood of exposure to novel infections, and these external  
50     cues of infection risk are also known to influence host behavioural responses  
51     <sup>4,7</sup>. Understanding variation in infection avoidance behaviours therefore  
52     provides an important functional link between the neurological, behavioural  
53     and immunological processes that together govern the spread of disease <sup>12</sup>.

54

55           Insects are ideal systems to investigate the interplay between infection  
56 and behaviour <sup>12,14</sup>. The fruit fly *Drosophila* is especially amenable to these  
57 studies, as it is one of the best developed model systems for host-pathogen  
58 interactions <sup>15</sup> and behavioural ecology and genetics <sup>16,17</sup>. One of the most  
59 studied pathogenic interactions in *Drosophila* is the host response to systemic  
60 and enteric infection with Drosophila C Virus (DCV) <sup>18,19</sup>. DCV is a horizontally  
61 transmitted +ssRNA virus that naturally infects the fly gut <sup>19-21</sup>, causing  
62 intestinal obstruction, severe metabolic dysfunction and eventually death <sup>22,23</sup>.  
63 As a consequence of its pathology, female flies infected with DCV are also  
64 known to exhibit behavioural modifications, such as reduced locomotion and  
65 increased sleep <sup>24</sup>. The *Drosophila*-DCV interaction therefore offers a powerful  
66 system to investigate the ecological consequences that may arise from the  
67 physiological and behavioural effects of enteric viral infections.

68

69           In the present study we used a combination of controlled experimental  
70 infections and foraging choice assays, to test whether adult *D. melanogaster*  
71 are able to avoid potentially infectious environments when foraging for food,  
72 and if avoidance behaviour is modified in response to virus exposure history  
73 and to different risks of acquiring DCV infection. We find evidence for  
74 avoidance behaviours in the form of reduced motivation to feed according to  
75 the risk of infection. However, these effects were only present in female flies  
76 previously exposed to DCV, indicating potentially important sexual  
77 dimorphism in infection avoidance.

78

## 79 **Materials and methods**

## 80 *Fly and virus stocks*

81 All flies used were from a long-term laboratory stock of Wolbachia-  
82 free *Drosophila melanogaster* Oregon R line, maintained on Lewis medium in  
83 standard conditions: 25°C, with a 12:12h light:dark cycle. Fly stocks were  
84 routinely kept on a 14-day cycle with non-overlapping generations under low  
85 larval densities. The DCV culture used in this experiment was grown in  
86 Schneider *Drosophila* Line 2 (DL2) as described in <sup>24</sup>. Ten-fold serial dilutions  
87 of this culture (diluted in Ringers buffer solution) were aliquoted and frozen  
88 at -80°C for long-term storage before use.

89

## 90 *Virus exposure*

91 Flies used in the foraging choice assays were obtained by preparing 10 vials of  
92 Lewis medium and yeast containing ten mated females. Flies were allowed to  
93 lay eggs for 48 hours resulting in age-matched progeny reared in similar larval  
94 densities. To test the effect of previous exposure to virus on avoidance  
95 behaviour during foraging, We exposed these progeny to DCV via the oral  
96 route of infection two to three days after eclosion. Oral DCV infection causes  
97 small but significant reduction in fly survival<sup>19</sup> and in we have found that  
98 orally infected flies experience changes affects fly mortality, fecundity, fecal  
99 shedding (Vale, unpublished data), activity and sleep<sup>24</sup>. Briefly, single-sex  
100 groups of 20 flies were placed in vials containing agar previously sprayed with  
101 DCV ("exposed" to 50 µl of 10<sup>8</sup> viral copies/ml) or the equivalent volume of  
102 Ringers buffer solution as a control ("not exposed"). This procedure produced  
103 10 replicate vials of either healthy or virus-exposed male or female flies. The  
104 viral dose used here was lower than previously reported methods<sup>19</sup>, so we  
105 first tested this dose was sufficient to result in viable DCV infections by

106 measuring changes in virus titres and fly survival in separate experiments  
 107 (Fig. 1). Fly survival was monitored on 5 replicate groups of 10 OreR female  
 108 flies per vial for 11 days following oral exposure. To measure changes in DCV  
 109 titre, twenty-five, 2-3 day-old female flies were individually housed in vials  
 110 previously sprayed with DCV as described above for 3 days. Five flies were  
 111 collected 1, 3, 6, 9 or 13 days after exposure and total RNA was extracted from  
 112 flies homogenised in Tri Reagent (Ambion), reverse-transcribed with M-MLV  
 113 reverse transcriptase (Promega) and random hexamer primers, and then  
 114 diluted 1:10 with nuclease free water. qRT-PCR was performed on an Applied  
 115 Biosystems StepOnePlus system using Fast SYBR Green Master Mix (Applied  
 116 Biosystems). We measured the relative fold change in DCV RNA relative to  
 117 *rp49*, an internal *Drosophila* control gene, calculated as  $2^{-\Delta\Delta Ct}$  as described in <sup>25</sup>.

118

# 119 *Foraging choice assays*

120 Following 3 days of virus exposure, we set up independent foraging  
 121 choice assays in cages - cylindrical transparent plastic containers (12 cm in  
 122 diameter) containing two equally spaced plastic vials of standard Lewis fly  
 123 medium supplemented with dry yeast. For each combination of “DCV  
 124 exposed” and “not exposed” male or female flies, we set up two sets of cages to  
 125 simulate different risks of infection: a “no risk” environment, with two clean  
 126 vials (sprayed with sterile Ringers solution), and a “high-risk” environment  
 127 where one of the vials was sprayed with DCV, as described above. Six replicate  
 128 20-fly groups were allocated to the “high-risk” chambers and four replicates to  
 129 the “no risk” chambers, resulting in a total of 40 independent foraging choice  
 130 cages. Flies were added to the chamber from a neutrally placed hole in the lid,  
 131 and the number of flies that settled on each vial was recorded every 30

132 minutes for five hours. Care was taken to randomise the position of the cages  
133 so that the orientation of the light did not influence the choice of the flies in  
134 any systematic way.

135

# 136 *Statistical Analysis*

137 To measure infection avoidance, we took two approaches. First, we  
138 hypothesised that the motivation to feed would be lower in environments  
139 where the risk of infection is higher <sup>7</sup>. We therefore compared the motivation  
140 to feed between the “no risk” and “high-risk” cages, measured as the  
141 proportion of flies inside each replicate cage that chose to feed on any of the  
142 provided food sources. We also asked whether flies that chose to feed showed  
143 any evidence of avoiding potentially infectious food sources. For this analysis  
144 we focussed on the “high risk” cages and recorded the proportion of flies  
145 choosing the clean food source over the infectious food source in each  
146 replicate cage. In both analyses of ‘motivation to feed’ and ‘infection  
147 avoidance’, data on the proportion of flies choosing each food source within  
148 each replicate cage were analysed with a generalised linear model assuming  
149 binomial error and logit link function, and included fly ‘sex’, ‘previous  
150 exposure’ and ‘infection risk’ as fixed effects. ‘Replicate cage’ was included as a  
151 random effect, nested within treatments. We also analysed the average  
152 motivation to feed and infection avoidance across all time points, in a model  
153 that included “time” as a random effect. Treatment specific contrasts were  
154 used to test the significance of pairwise comparisons. Analyses were carried  
155 out using JMP 12 <sup>26</sup>.

156

# 157 **Results and Discussion**

158           The ability to detect and discriminate between clean and potentially  
159   infectious environments is vital to avoid the adverse consequences of  
160   infection. In this study we tested if infection avoidance behaviour in  
161   *Drosophila melanogaster* is modified by its previous exposure to a viral  
162   pathogen and by the risk of infection with that same pathogen when  
163   encountered during foraging. Viral exposure prior to the behavioural assay  
164   was achieved by placing flies in a DCV contaminated environment for 3 days,  
165   allowing flies to acquire DCV infection orally. DCV acquired through the oral  
166   route using this protocol continued to replicate within the fly, increasing by  
167   10-100 fold by day 13 following oral exposure ( $F_{4,19} = 8.78$ ,  $p=0.0003$ ; Fig. 1A)  
168   and resulted in up to 20% mortality within this period (Fig. 1B).

169

170           In the foraging choice assay, only a fraction of flies chose either of the  
171   food sources provided, and this motivation to feed increased over time for  
172   flies in all treatment groups ( $\chi^2_1 = 11.00$ ,  $p=0.001$ ; Fig. 2A). The rate at which  
173   motivation increased differed between sexes ('Time  $\times$  Sex' interaction,  $\chi^2_1 =$   
174   12.47,  $p=0.0004$ ), and on average female flies showed greater motivation to  
175   feed than males ( $\chi^2_1 = 5.01$ ,  $p=0.025$ ), with 67% of female and 36% of male  
176   flies making a choice to feed on any of the provided substrates during the  
177   observation period. Once flies had made the choice to feed on one of the  
178   provided food sources, the choice between a clean and a potentially infectious  
179   food source was not affected by previous exposure to DCV ('previous  
180   exposure',  $\chi^2_1 = 0.513$ ,  $p=0.47$ ) in either male or female flies ('sex',  $\chi^2_1 = 0.595$ ,  
181    $p=0.44$ ).

182



183           Across the entire observation period, the motivation to feed differed  
 184   between sexes, and depended both on their previous exposure and on their  
 185   current risk of infection ('Sex' × 'risk of infection' × 'Previous exposure'  
 186   interaction,  $\chi^2_1 = 21.82$ ,  $p < 0.0001$ ). The proportion of males choosing any food  
 187   substrate did not vary with previous exposure to DCV in either high-risk ( $\chi^2_1 =$   
 188   2.21,  $p = 0.137$ ) or no-risk environments ( $\chi^2_1 = 0.09$ ,  $p = 0.764$ ; Fig. 1). In female  
 189   flies however, previous exposure and current infection risk affected the  
 190   motivation to feed on the provided food sources. When there was no risk of  
 191   infection (Fig. 2B, light grey bars) the motivation to feed was greater in  
 192   females that were previously exposed to DCV than in otherwise healthy, non-  
 193   exposed females ( $\chi^2_1 = 104.11$ ,  $p < 0.001$ ). Among females that were previously  
 194   exposed to infection, we found that the presence of a risk of acquiring  
 195   infection resulted in lower foraging effort - with just over 50% of flies making  
 196   the choice to feed - compared to females in cages where there was no risk of  
 197   acquiring infection, where over 80% of flies made the choice to feed (Fig. 2B;  
 198    $\chi^2_1 = 168.48$ ,  $p < 0.001$ ).

199  
 200           In addition to responding to external cues of infection (infection risk),  
 201   internal physiological cues (in this case, previous exposure to DCV) may also  
 202   modify avoidance behaviour. Behavioural modifications due to infection are  
 203   widely reported among animals <sup>9,27</sup>, and can be classified into (i) parasitic  
 204   manipulation that enhances parasite transmission <sup>9</sup> (ii) sickness behaviours  
 205   that benefit the host by conserving energetic resources during infection <sup>13</sup>, or  
 206   (iii) side-effects of pathogenicity that do not benefit the host or the parasite <sup>27</sup>.  
 207   Female flies infected orally with DCV are known to experience increased  
 208   lethargy and sleep <sup>24</sup>, so these effects could also explain the reduced feeding

209 activity we detected in female flies that had been previously exposed to DCV.  
 210 Another potential explanation for reduced motivation to feed in previously  
 211 exposed flies is infection-induced anorexia <sup>28</sup>, a commonly described sickness  
 212 behaviour <sup>13</sup>. However, it is unlikely that a lower motivation feed is simply a  
 213 symptom of a “sick” fly, because it varied according to the risk of infection, and  
 214 even reached 80% in exposed flies when foraging in a ‘no risk’ environment  
 215 (Fig. 2). This suggests that flies are actively avoiding contact with the  
 216 potentially contagious food source by lowering their foraging effort.

217

218 The higher motivation to feed of some female flies when the risk of  
 219 infection was absent (Fig. 2) suggests flies were able to identify external cues  
 220 of infection risk. Identifying infection cues is a general prerequisite of  
 221 avoidance behaviours and occurs across a wide range of different taxa. For  
 222 example, lobsters are known to detect and avoid virus-infected conspecifics <sup>29</sup>;  
 223 fruit flies and nematodes are capable of avoiding pathogenic bacteria <sup>30,31</sup>;  
 224 gypsy moth larvae are able to detect and avoid virus-contaminated foliage <sup>14</sup>;  
 225 sheep have been found to prefer to graze in parasite-poor patches <sup>32</sup>; and it is  
 226 has been argued that the disgust response in humans has evolved because it  
 227 decreases contact with potential infection <sup>33</sup>. It is unclear how flies are able to  
 228 identify food sources contaminated with a viral pathogen. In *Drosophila* and *C.*  
 229 *elegans* avoidance of pathogenic bacteria is enabled by evolutionary  
 230 conserved olfactory and chemosensory pathways <sup>30,31</sup>, while avoidance of  
 231 parasitic wasps appears to be mainly enabled by the visual sensory system <sup>34</sup>.  
 232 While avoiding virus infected conspecifics is probably driven by visual cues of  
 233 infection <sup>29</sup>, it remains unclear how virus-contaminated environments may  
 234 trigger a lower motivation to feed in *Drosophila*.

235

236           The fact that only female flies demonstrated avoidance is an indication  
237 that any potentially adaptive effects of avoiding infection may be related to  
238 oviposition, which coincides with feeding. For flies previously exposed to DCV,  
239 avoiding infection would not confer substantial direct benefits given the  
240 physiological and behavioural costs of this infection <sup>22-24</sup>, but would however  
241 reduce the exposure of future offspring to infection. While flies previously  
242 exposed to DCV do not appear to immune primed following an initial viral  
243 exposure <sup>35</sup>, our results point to a sort of behavioural priming, where females  
244 previously exposed to infection avoid foraging in potentially infectious  
245 environments.

246

247           In summary, using a combination of experimental infections and  
248 behavioural assays, we find evidence for infection avoidance in *Drosophila* in  
249 the form of reduced motivation to feed, which was most pronounced when  
250 flies were faced with an increased risk of encountering an infectious food  
251 source. However, these effects were only present in female flies, indicating  
252 potentially important sexual dimorphism in infection avoidance.  
253 Understanding how avoidance behaviours may vary is therefore important for  
254 our understanding of how disease will spread in natural populations <sup>4</sup>, and  
255 more broadly how pathogens might evolve in response to variation in host  
256 infection avoidance strategies <sup>36,37</sup>.

257

## 258 **Acknowledgements**

259 We thank H. Cowan and H. Borthwick for preparing fly medium, K. Monteith  
260 and S. Lewis for assistance with the qPCR, the members of the Vale, Obbard

261 and Ross labs for helpful suggestions. This work was supported by a strategic  
 262 award from the Wellcome Trust for the Centre for Immunity, Infection and  
 263 Evolution (grant reference no. 095831), and by a Society in Science – Branco  
 264 Weiss fellowship, both awarded to P. Vale. P.Vale is also supported by a  
 265 Chancellor’s Fellowship from the School of Biological Sciences, University of  
 266 Edinburgh.

267

# **268 Competing interests**

269 The authors declare that they have no competing interests.

270

# **271 Author contributions**

272 PFV conceived the study. PFV and MDJ designed the experiment. MDJ and PFV  
 273 carried out the experimental work. PFV analysed the data, wrote the  
 274 manuscript and provided all research consumables.

## 275      **References**

- 276      1. Fellous, S., Duncan, A. B., Quillery, E., Vale, P. F. & Kaltz, O. Genetic  
277      influence on disease spread following arrival of infected carriers. *Ecol.*  
278      *Lett.* **15**, 186–192 (2012).
- 279      2. Vale, P. F. & Little, T. J. Measuring parasite fitness under genetic and  
280      thermal variation. *Heredity* **103**, 102–109 (2009).
- 281      3. Susi, H., Barrès, B., Vale, P. F. & Laine, A.-L. Co-infection alters population  
282      dynamics of infectious disease. *Nat. Commun.* **6**, (2015).
- 283      4. Barron, D., Gervasi, S., Pruitt, J. & Martin, L. Behavioral competence: how  
284      host behaviors can interact to influence parasite transmission risk. *Curr.*  
285      *Opin. Behav. Sci.* **6**, 35–40 (2015).
- 286      5. Paull, S. H. *et al.* From superspreaders to disease hotspots: linking  
287      transmission across hosts and space. *Front. Ecol. Environ.* **10**, 75–82  
288      (2012).
- 289      6. Webster, C. L. *et al.* The Discovery, Distribution, and Evolution of Viruses  
290      Associated with *Drosophila melanogaster*. *PLOS Biol* **13**, e1002210  
291      (2015).
- 292      7. Curtis, V. A. Infection-avoidance behaviour in humans and other animals.  
293      *Trends Immunol.* **35**, 457–464 (2014).
- 294      8. Parker, B. J., Barribeau, S. M., Laughton, A. M., de Roode, J. C. & Gerardo, N.  
295      M. Non-immunological defense in an evolutionary framework. *Trends Ecol.*  
296      *Evol.* **26**, 242–248 (2011).
- 297      9. Moore, J. An overview of parasite-induced behavioral alterations – and  
298      some lessons from bats. *J. Exp. Biol.* **216**, 11–17 (2013).
- 299      10. Wolinska, J. & King, K. C. Environment can alter selection in host-parasite  
300      interactions. *Trends Parasitol.* **25**, 236–244 (2009).

- 301 11. Vale, P. F., Salvaudon, L., Kaltz, O. & Fellous, S. The role of the environment  
302 in the evolutionary ecology of host parasite interactions. *Infect. Genet.*  
303 *Evol.* **8**, 302–305 (2008).
- 304 12. Adamo, S. A. Comparative psychoneuroimmunology: evidence from the  
305 insects. *Behav. Cogn. Neurosci. Rev.* **5**, 128–140 (2006).
- 306 13. Adelman, J. S. & Martin, L. B. Vertebrate sickness behaviors: Adaptive and  
307 integrated neuroendocrine immune responses. *Integr. Comp. Biol.* **49**,  
308 202–214 (2009).
- 309 14. Parker, B. J., Elder, B. D. & Dwyer, G. Host behaviour and exposure risk in  
310 an insect-pathogen interaction. *J. Anim. Ecol.* **79**, 863–870 (2010).
- 311 15. Neyen, C., Bretscher, A. J., Binggeli, O. & Lemaitre, B. Methods to study  
312 *Drosophila* immunity. *Methods San Diego Calif* **68**, 116–128 (2014).
- 313 16. Dubnau, J. *Behavioral Genetics of the Fly (Drosophila Melanogaster)*.  
314 (Cambridge University Press, 2014).
- 315 17. Sokolowski, M. B. *Drosophila*: Genetics meets behaviour. *Nat. Rev. Genet.* **2**,  
316 879–890 (2001).
- 317 18. Dostert, C. *et al.* The Jak-STAT signaling pathway is required but not  
318 sufficient for the antiviral response of *drosophila*. *Nat. Immunol.* **6**, 946–  
319 953 (2005).
- 320 19. Ferreira, Á. G. *et al.* The Toll-Dorsal Pathway Is Required for Resistance to  
321 Viral Oral Infection in *Drosophila*. *PLoS Pathog.* **10**, (2014).
- 322 20. Huszar, T. & Imler, J. in *Advances in Virus Research* **Volume 72**, 227–265  
323 (Academic Press, 2008).
- 324 21. Kapun, M., Nolte, V., Flatt, T. & Schlötterer, C. Host Range and Specificity of  
325 the *Drosophila* C Virus. *PLoS ONE* **5**, e12421 (2010).

- 326 22. Arnold, P. A., Johnson, K. N. & White, C. R. Physiological and metabolic  
327 consequences of viral infection in *Drosophila melanogaster*. *J. Exp. Biol.*  
328 **216**, 3350–3357 (2013).
- 329 23. Chtarbanova, S. *et al.* *Drosophila* C virus systemic infection leads to  
330 intestinal obstruction. *J. Virol.* (2014). doi:10.1128/JVI.02320-14
- 331 24. Vale, P. F. & Jardine, M. D. Sex-specific behavioural symptoms of viral gut  
332 infection and Wolbachia in *Drosophila melanogaster*. *J. Insect Physiol.* **82**,  
333 28–32 (2015).
- 334 25. Livak, K. J. & Schmittgen, T. D. Analysis of relative gene expression data  
335 using real-time quantitative PCR and the 2(-Delta Delta C(T)) Method.  
336 *Methods San Diego Calif* **25**, 402–408 (2001).
- 337 26. *JMP*. (SAS Institute Inc.).
- 338 27. Barber, I. & Dingemanse, N. J. Parasitism and the evolutionary ecology of  
339 animal personality. *Philos. Trans. R. Soc. Lond. B Biol. Sci.* **365**, 4077–4088  
340 (2010).
- 341 28. Ayres, J. S. & Schneider, D. S. The Role of Anorexia in Resistance and  
342 Tolerance to Infections in *Drosophila*. *PLoS Biol* **7**, e1000150 (2009).
- 343 29. Behringer, D. C., Butler, M. J. & Shields, J. D. Ecology: Avoidance of disease  
344 by social lobsters. *Nature* **441**, 421–421 (2006).
- 345 30. Babin, A. *et al.* Fruit flies learn to avoid odours associated with virulent  
346 infection. *Biol. Lett.* **10**, 20140048 (2014).
- 347 31. Meisel, J. D. & Kim, D. H. Behavioral avoidance of pathogenic bacteria by  
348 *Caenorhabditis elegans*. *Trends Immunol.* **35**, 465–470 (2014).
- 349 32. Hutchings, M. ., Knowler, K. ., McAnulty, R. & McEwan, J. . Genetically  
350 resistant sheep avoid parasites to a greater extent than do susceptible  
351 sheep. *Proc. R. Soc. B Biol. Sci.* **274**, 1839–1844 (2007).

- 352 33. Curtis, V., de Barra, M. & Aunger, R. Disgust as an adaptive system for  
353 disease avoidance behaviour. *Philos. Trans. R. Soc. Lond. B. Biol. Sci.* **366**,  
354 389–401 (2011).
- 355 34. Kacsoh, B. Z., Lynch, Z. R., Mortimer, N. T. & Schlenke, T. A. Fruit Flies  
356 Medicate Offspring After Seeing Parasites. *Science* **339**, 947–950 (2013).
- 357 35. Longdon, B., Cao, C., Martinez, J. & Jiggins, F. M. Previous Exposure to an  
358 RNA Virus Does Not Protect against Subsequent Infection in *Drosophila*  
359 *melanogaster*. *PLoS ONE* **8**, e73833 (2013).
- 360 36. Boots, M. & Bowers, R. G. Three mechanisms of host resistance to  
361 microparasites-avoidance, recovery and tolerance-show different  
362 evolutionary dynamics. *J. Theor. Biol.* **201**, 13–23 (1999).
- 363 37. McLeod, D. V. & Day, T. Pathogen evolution under host avoidance  
364 plasticity. *Proc. Biol. Sci.* **282**, (2015).
- 365
- 366



## Figure legends

368

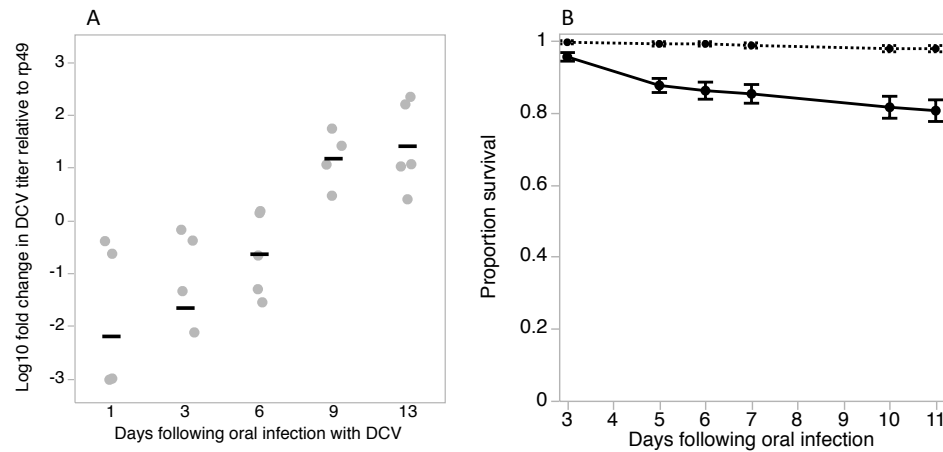

369

370 **Fig.1.** Exposing flies to DCV by placing them in DCV-contaminated vials for

371 three days resulted in flies acquiring replicating virus as shown by the

372 increase in DCV titres over time (Fig. 1A). Grey points shown are individual

373 replicate female flies, black bars are mean titres. This orally acquired DCV

374 infection had a moderate effect on fly survival (full black line) compared to

375 uninfected control flies (dotted line) (Fig. 1B).

376

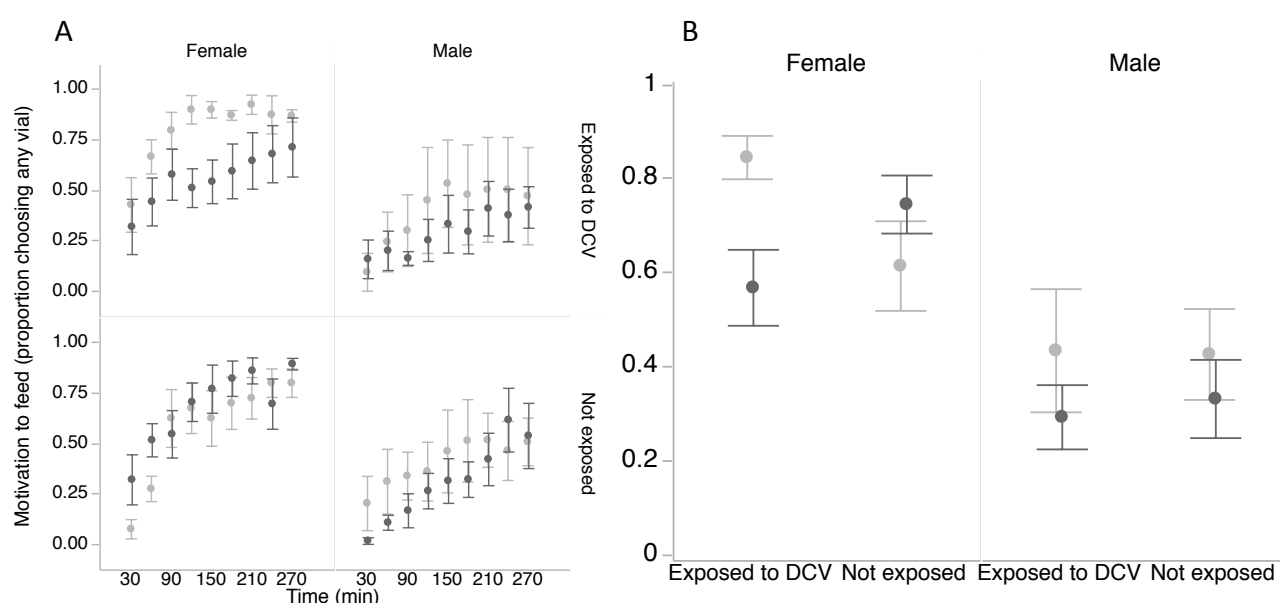

387

388 **Fig. 2.** Single sex-groups of flies that had been previously exposed either to  
389 DCV or to a sterile inoculum were tested in a 'no-risk' environment (choice  
390 between two clean vials; light grey) or a 'high-risk' environment (choice  
391 between a clean vial and a DCV-contaminated vial; dark grey). The motivation  
392 to feed, measured as the proportion of flies in the cage that fed on any of the  
393 provided food sources, increased over time (Fig 2A). Fig 2B shows the average  
394 of motivation to feed taken across the whole observation period for each  
395 combination of fly sex, prior DCV exposure and current exposure risk ('no-  
396 risk' environment (light grey) or a 'high-risk' environment (dark grey). Data  
397 show means  $\pm$  SE.

398
